# Supplementary material
Source: MDPI journal article supplement (https://www.mdpi.com/1424-2818/15/3/461)
Supplement: s1 [file s1]

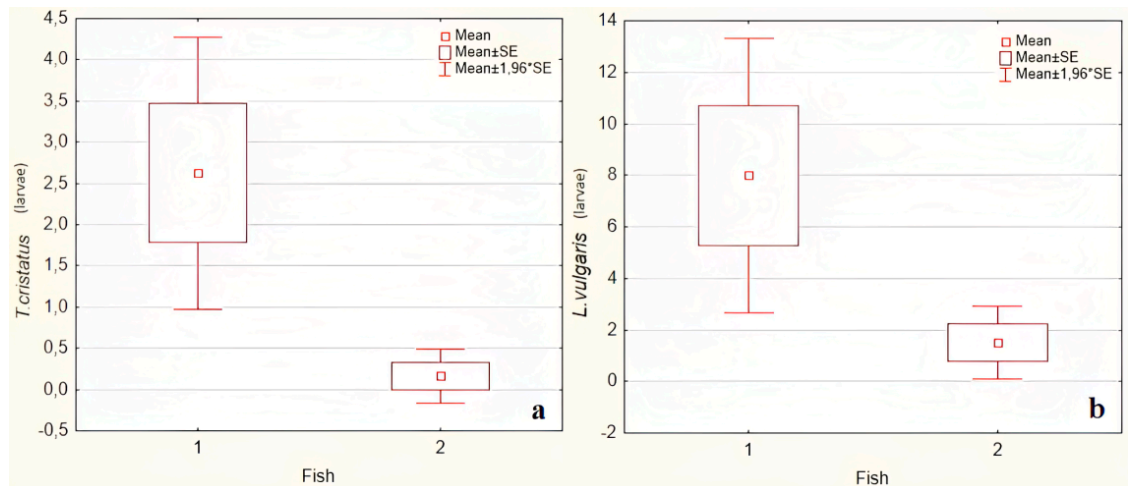

**Figure S1.** Dynamics of the abundance of newts in Silene Nature Park, South East of Latvia, during the monitoring period 2018 and 2022 using method 2.2.1 (average number of individuals per 10 net sweeps per pond, mean/pond): a – *T. cristatus*, b – *L. vulgaris*, depending on the presence of alien predatory fish ("Fish"): 1 – no fish and 2 – presence of fish.

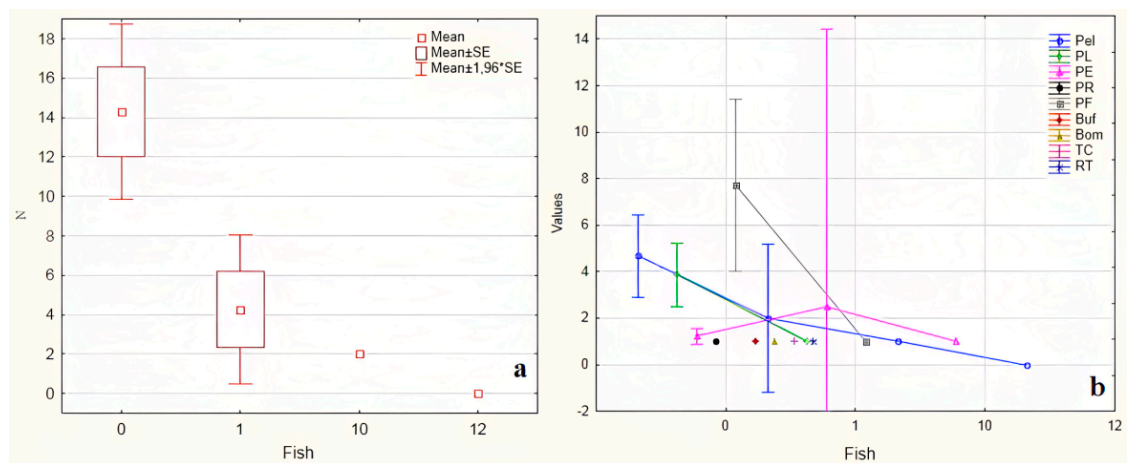

**Figure S2.** Dynamics of the abundance of amphibians in Silene Nature Park, South East of Latvia, in 2022 using method 2.2.3 (mean/pond): a – average number of individuals of 9 amphibian species (N – average number of individuals), b – the average number of individuals of each species separately (designations in the text), depending on the presence of alien predatory fish ("Fish"): 0 – no fish and 1 – fish (N=1), 10 – fish (N=10), 12 – fish (N=12).

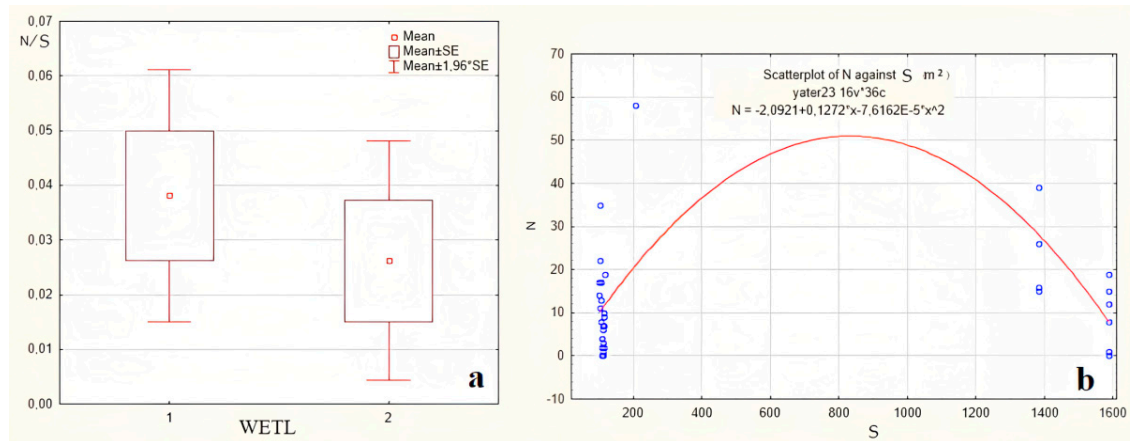

**Figure S3.** The dependence of the area ( $S$ ,  $m^2$ ) of the reservoir on the number of amphibians ( $N$ ) in Silene Nature Park, South East of Latvia, in 2022 using method 2.2.3: a - Extrapolation coefficient dependence of the number of amphibians on the area of the reservoir ( $N/S$ ) in wetlands (“wetl”: 1 – geographically isolated wetlands (GIW); 2 – non-isolated ponds (nGIW)); b - the number of amphibians ( $N$ ) found depending on the surface area ( $S$ ) of the water bodies.

**Table S1.** Result of one-way NPMANOVA statistical method for testing the difference between the data (the average number of individuals of amphibians) of two types of wetlands (geographically isolated wetlands (GIW) and non-isolated (nGIW)) in Silene Nature Park, South East of Latvia, using methods 2.2.1 - 2.2.2 and 2.2.3.

| Name                         | Meaning<br>using the method 2.2.1 - 2.2.2 | Meaning<br>using the method 2.2.3 |
|------------------------------|-------------------------------------------|-----------------------------------|
| Permutation N:               | 9999                                      | 9999                              |
| Total sum of squares:        | 3183                                      | 1,39E+07                          |
| Within-group sum of squares: | 2718                                      | 8,91E+06                          |
| F:                           | 3,764                                     | 18,94                             |
| p (same):                    | 0,023                                     | 0,0002                            |
